# Supplementary material
Source: PubMed Central journal article supplement (PMC4379463)
Supplement: peds.2014-3167_peds.2014-3167SupplementaryData.pdf [file peds.2014-3167_peds.2014-3167SupplementaryData.pdf]

## Supplemental Information

### APPENDIX 1. MYASTHMA WORKFLOW

Parents were enrolled in MyAsthma onsite at their child's primary care practice. The parent accessed the parent interface of the MyAsthma portal online and initially recorded treatment goals and treatment concerns related to asthma, which were viewable by clinicians in the EHR via the clinician interface. Parents then completed an asthma control survey, the results of

which were recorded in a timeline on both the parent and clinician interfaces. The family and the practice both received the results of the survey and were given decision support based on the results; if poor control or side effects were entered, families were notified to call the practice and the practice was notified to contact families, either via a portal message or telephone encounter. If control was not poor and there were no side effects, parents were directed to continue fol-

lowing their child's asthma care plan. E-mail reminders were sent to families each month to remind them to complete the monthly control survey. Optional functions of MyAsthma included viewing patient education content (videos and handouts) and accessing their child's asthma care plan, a document generated in the office. Clinicians could recommend specific educational content to families via the portal and could view whether the family had viewed the content.

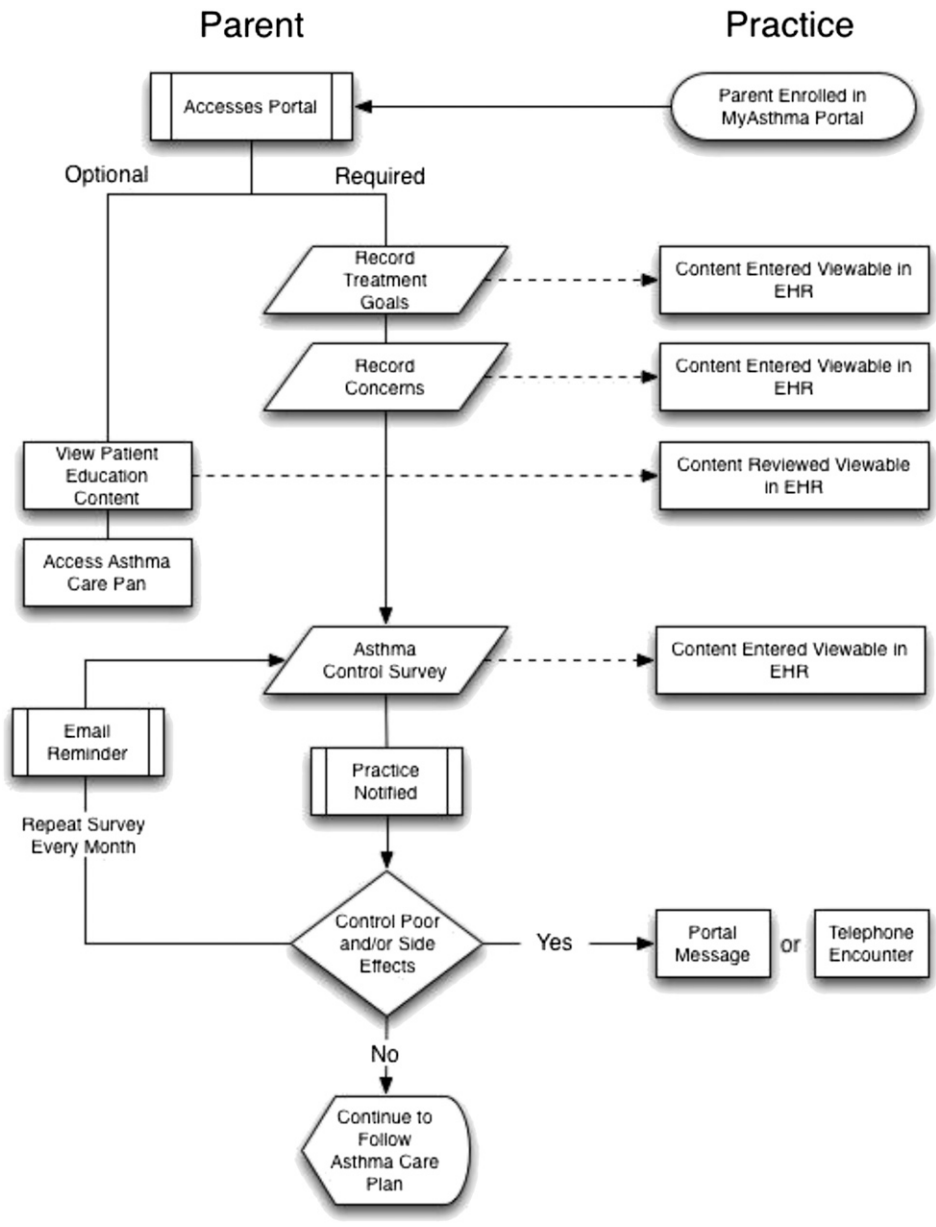

**APPENDIX 2. THE MYASTHMA PORTAL: FEATURES**

Homepage: The MyAsthma Homepage displayed the timeline of monthly asthma

control survey results, as well as parents' concerns and goals for asthma care. ©2014 The Children's Hospital of Philadelphia. All Rights Reserved.

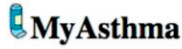

|                               |                                  |                           |                           |
|-------------------------------|----------------------------------|---------------------------|---------------------------|
| <a href="#">MyAsthma Home</a> | <a href="#">Asthma Education</a> | <a href="#">Care Plan</a> | <a href="#">Care Team</a> |
|-------------------------------|----------------------------------|---------------------------|---------------------------|

|                                                                                                              |                                                                                                                                              |                                                                                                                                                                              |
|--------------------------------------------------------------------------------------------------------------|----------------------------------------------------------------------------------------------------------------------------------------------|------------------------------------------------------------------------------------------------------------------------------------------------------------------------------|
| <b>Check-in Survey</b><br>✓ You are up-to-date!<br>Next check-in: Oct 1, 2014<br>Last check-in: Sep 11, 2014 | <b>Goals</b> <a href="#">Edit</a><br><b>Parent's Goal:</b><br>not miss work due to child's asthma<br><b>Child's Goal:</b><br>NOT miss school | <b>Concerns</b> <a href="#">Edit</a><br>Steroids impacting growth<br>Cost of medication<br>Impact on life<br>Time to manage medications<br><b>Other:</b> taste of prednisone |
|--------------------------------------------------------------------------------------------------------------|----------------------------------------------------------------------------------------------------------------------------------------------|------------------------------------------------------------------------------------------------------------------------------------------------------------------------------|

**Check-in Survey Timeline**

■ No concern   
 ■ Of concern   
 ■ Major concern

| Asthma Control Assessment | Sep                   | Oct                 | Nov                  | Dec                  | Jan                  | Feb                  | Mar                   | Apr                   | May                   | Jun                   | Jul                   | Aug                   |
|---------------------------|-----------------------|---------------------|----------------------|----------------------|----------------------|----------------------|-----------------------|-----------------------|-----------------------|-----------------------|-----------------------|-----------------------|
| Asthma control            | Well                  | Well                | Well                 | Uncontrolled         | Uncontrolled         | Poor                 | Well                  | Well                  | Well                  | Well                  | Well                  | Well                  |
| Meeting goals             | Very much             | Very much           | Moderately           | Slightly             | Slightly             | Moderately           | Very much             |
| Managing concerns         | Very much             | Very much           | Moderately           | Moderately           | Definitely           | Definitely           | Very much             | Very much             | Definitely            | Very much             | Very much             | Very much             |
| Side effects              | No                    | No                  | No                   | No                   | Yes                  | No                   | No                    | No                    | No                    | No                    | No                    | No                    |
| Missed school/day care    | 1                     | 0                   | 2                    | 0                    | 2                    | 0                    | 0                     | 0                     | 0                     | 0                     | 0                     | 0                     |
| ER or urgent care visit   | 0                     | 0                   | 0                    | 0                    | 0                    | 0                    | 0                     | 0                     | 0                     | 0                     | 0                     | 0                     |
| Hospital admission        | 0                     | 0                   | 0                    | 0                    | 0                    | 0                    | 0                     | 0                     | 0                     | 0                     | 0                     | 0                     |
| Steroid by mouth          | 0                     | 0                   | 0                    | 0                    | 1                    | 0                    | 0                     | 0                     | 0                     | 0                     | 0                     | 0                     |
| Home/school disruption    | None of the time      | None of the time    | A little of the time | Some of the time     | Some of the time     | None of the time     | A little of the time  | A little of the time  | A little of the time  | None of the time      | None of the time      | None of the time      |
| Shortness of breath       | Not at all            | Not at all          | Once or twice a week | Once a day           | 2 or 3 nights a week | Once or twice a week | Not at all            |
| Symptoms at night         | Not at all            | Not at all          | Once or twice a week | 2 or 3 nights a week | 2 or 3 nights a week | Once a week          | Once or twice a week  | Once or twice a week  | Once or twice a week  | Once or twice a week  | Not at all            | Once or twice a week  |
| Rescue inhaler/nebulizer  | Not at all            | Once a week or less | Once a week or less  | 1 or 2 times per day | 1 or 2 times per day | Once a week or less  | Once a week or less   | Once a week or less   | Once a week or less   | Once a week or less   | Not at all            | Not at all            |
| Parent rating of control  | Completely controlled | Well controlled     | Well controlled      | Poorly controlled    | Somewhat controlled  | Somewhat controlled  | Completely controlled | Completely controlled | Completely controlled | Completely controlled | Completely controlled | Completely controlled |
| Taking medications        | More than half        | More than half      | More than half       | All                  | All                  | All                  | More than half        | More than half        | More than half        | All                   | More than half        | All                   |

Education: Both videos and handouts were available through MyAsthma.

©2014 The Children's Hospital of Philadelphia. All Rights Reserved.

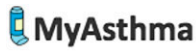

| MyAsthma Home                                                                          | Asthma Education                | Care Plan     | Care Team                   |
|----------------------------------------------------------------------------------------|---------------------------------|---------------|-----------------------------|
| <b>Education</b>                                                                       |                                 |               |                             |
| Education materials help everyone better understand your child's asthma and treatment. |                                 |               |                             |
| <b>General</b>                                                                         |                                 | <b>Viewed</b> | <b>Provider Recommended</b> |
| Asthma Intro: What is Asthma & Symptoms                                                | <a href="#">Watch video...</a>  | 10/3/2014     |                             |
| Asthma Flares                                                                          | <a href="#">Watch video...</a>  |               |                             |
| Asthma: What is it?                                                                    | <a href="#">View handout...</a> | 10/3/2014     |                             |
| <b>Triggers</b>                                                                        |                                 | <b>Viewed</b> | <b>Provider Recommended</b> |
| Asthma Triggers                                                                        | <a href="#">Watch video...</a>  | 10/3/2014     |                             |
| Asthma Triggers                                                                        | <a href="#">View handout...</a> | 10/3/2014     |                             |
| Cigarette Smoke                                                                        | <a href="#">View handout...</a> | 10/3/2014     |                             |
| Cockroaches                                                                            | <a href="#">View handout...</a> |               |                             |
| Dust Mites                                                                             | <a href="#">View handout...</a> |               |                             |
| How Asthma-Friendly Is Your Child-Care Setting?                                        | <a href="#">View handout...</a> |               |                             |
| Molds                                                                                  | <a href="#">View handout...</a> |               |                             |
| Pets and Animals                                                                       | <a href="#">View handout...</a> |               |                             |
| Protect your children; Take the smoke-free home pledge                                 | <a href="#">View handout...</a> |               |                             |
| <b>Medications</b>                                                                     |                                 | <b>Viewed</b> | <b>Provider Recommended</b> |
| Asthma Medications                                                                     | <a href="#">Watch video...</a>  |               |                             |
| Asthma Med Concerns                                                                    | <a href="#">Watch video...</a>  |               |                             |
| How to use your Dry Powder Inhaler                                                     | <a href="#">View handout...</a> |               |                             |
| How to use a Metered Dose Inhaler with a Facemask                                      | <a href="#">View handout...</a> |               |                             |
| How to use a Metered Dose Inhaler with a Mouthpiece                                    | <a href="#">View handout...</a> |               |                             |
| Metered Dose Inhaler Guide                                                             | <a href="#">View handout...</a> |               |                             |
| <b>Control</b>                                                                         |                                 | <b>Viewed</b> | <b>Provider Recommended</b> |
| Asthma Control                                                                         | <a href="#">Watch video...</a>  |               |                             |
| Asthma Care Plan                                                                       | <a href="#">Watch video...</a>  |               |                             |
| <b>For Kids</b>                                                                        |                                 | <b>Viewed</b> | <b>Provider Recommended</b> |
| Kids Health Galaxy                                                                     | <a href="#">Watch video...</a>  | 10/3/2014     |                             |
| Asthma Fast Facts for Kids                                                             | <a href="#">View handout...</a> |               |                             |
| <a href="#">Home</a>                                                                   |                                 |               |                             |

# MyAsthma

- [MyAsthma Home](#)
- [Asthma Education](#)
- [Care Plan](#)
- [Care Team](#)

## Asthma Intro: What is Asthma & Symptoms

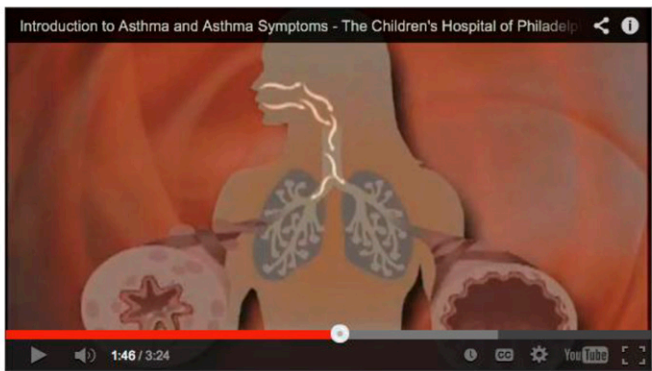

[Back](#)

[Back to the Home Page](#)

Decision Support: On completion of the monthly control survey, both parents

and clinicians received the results as well as decision support. ©2014 The

Children's Hospital of Philadelphia. All Rights Reserved.

**MyAsthma**

**Check-in Results**

**Your child's asthma is:** **⚠ UNCONTROLLED**  
You reported your child is experiencing medication side effects

**Instructions:** Please call your doctor's office to discuss your child's asthma control and side effects.

The results of the check-in have been sent to your doctor's office.

You can always call or [send a message](#) to your doctor's office with any questions.

**If this is a medical emergency, please call 911.**

Would you like to learn more about asthma with CHOP videos and handouts?

---

[Back to the Home Page](#)

**MyAsthma**

**Check-in Results**

**Your child's asthma is:** **✔ WELL CONTROLLED**

**Instructions:** Please continue to follow your asthma care plan.

The results of the check-in have been sent to your doctor's office.

You can always call or [send a message](#) to your doctor's office with any questions.

**If this is a medical emergency, please call 911.**

Would you like to learn more about asthma with CHOP videos and handouts?

---

[Back to the Home Page](#)
